# Supplementary material for: Movement velocity can be used to estimate the relative load during the bench press and leg press exercises in older women
Source: PeerJ. 2019 Aug 20;7:e7533. doi: 10.7717/peerj.7533 (PMC6707344; doi:10.7717/peerj.7533)
Supplement: Supplemental Information 1 [file peerj-07-7533-s001.xlsx]

## Sheet: subjects
	Subject	Age	Weight	Height
	1	66	72.8	153
	2	66	52	147
	3	68	61.8	150
	4	69	66.5
	5	68	73.1	145
	6	64	60.5	164
	7	68	71.4	158
	8	68	69.4	152
	9	74	67.4	150
	10	67	65.4	161
	11	61	66.5	157
	12	78	51.7	148
	13	66	64.9	155
	14	72	88.4	158
	15	65	64.9	152
	16	68	72.2	150
	17	69	73.4	163
	18	65	100.8	161
	19	72	69.2	160
	20	70	55.4	161
	21	66	102.3	166
	22	70	70.4	157.5
	Prom	68.1818	70.0182	155.643
	Desve	3.63366	12.9126	6.03561

## Sheet: final results_LegPress
1	2	3	4	5	subject
0.8574	0.8547	0.7557	0.6907	0.8547
0.7924	0.7887	0.7027	0.6447	0.7887			0	0.8574	0.8547	0.7557	0.6907	0.8547	0.7665	0.8104	0.78	0.7641	0.9111	0.7359	0.6881	0.6245	0.7621	0.6485	0.7538	0.8101	0.7638	0.686	0.7557	0.9504	0.772581	0.082343	10.6582
0.7274	0.7227	0.6497	0.5987	0.7227			10	0.7924	0.7887	0.7027	0.6447	0.7887	0.7115	0.7484	0.725	0.7071	0.8391	0.6839	0.6391	0.5815	0.7041	0.6025	0.7008	0.7521	0.7088	0.638	0.7047	0.8794	0.716343	0.0743656	10.3813
0.6624	0.6567	0.5967	0.5527	0.6567			20	0.7274	0.7227	0.6497	0.5987	0.7227	0.6565	0.6864	0.67	0.6501	0.7671	0.6319	0.5901	0.5385	0.6461	0.5565	0.6478	0.6941	0.6538	0.59	0.6537	0.8084	0.660105	0.0664463	10.066
0.5974	0.5907	0.5437	0.5067	0.5907			30	0.6624	0.6567	0.5967	0.5527	0.6567	0.6015	0.6244	0.615	0.5931	0.6951	0.5799	0.5411	0.4955	0.5881	0.5105	0.5948	0.6361	0.5988	0.542	0.6027	0.7374	0.603867	0.0586085	9.70553
0.5324	0.5247	0.4907	0.4607	0.5247			40	0.5974	0.5907	0.5437	0.5067	0.5907	0.5465	0.5624	0.56	0.5361	0.6231	0.5279	0.4921	0.4525	0.5301	0.4645	0.5418	0.5781	0.5438	0.494	0.5517	0.6664	0.547629	0.0508898	9.29277
0.4674	0.4587	0.4377	0.4147	0.4587			50	0.5324	0.5247	0.4907	0.4607	0.5247	0.4915	0.5004	0.505	0.4791	0.5511	0.4759	0.4431	0.4095	0.4721	0.4185	0.4888	0.5201	0.4888	0.446	0.5007	0.5954	0.49139	0.0433541	8.82275
0.4024	0.3927	0.3847	0.3687	0.3927			60	0.4674	0.4587	0.4377	0.4147	0.4587	0.4365	0.4384	0.45	0.4221	0.4791	0.4239	0.3941	0.3665	0.4141	0.3725	0.4358	0.4621	0.4338	0.398	0.4497	0.5244	0.435152	0.036116	8.29963
0.3374	0.3267	0.3317	0.3227	0.3267			70	0.4024	0.3927	0.3847	0.3687	0.3927	0.3815	0.3764	0.395	0.3651	0.4071	0.3719	0.3451	0.3235	0.3561	0.3265	0.3828	0.4041	0.3788	0.35	0.3987	0.4534	0.378914	0.0293961	7.75799
0.2724	0.2607	0.2787	0.2767	0.2607			80	0.3374	0.3267	0.3317	0.3227	0.3267	0.3265	0.3144	0.34	0.3081	0.3351	0.3199	0.2961	0.2805	0.2981	0.2805	0.3298	0.3461	0.3238	0.302	0.3477	0.3824	0.322676	0.0236407	7.32644
0.2074	0.1947	0.2257	0.2307	0.1947			90	0.2724	0.2607	0.2787	0.2767	0.2607	0.2715	0.2524	0.285	0.2511	0.2631	0.2679	0.2471	0.2375	0.2401	0.2345	0.2768	0.2881	0.2688	0.254	0.2967	0.3114	0.266438	0.0197132	7.39878
							100	0.2074	0.1947	0.2257	0.2307	0.1947	0.2165	0.1904	0.23	0.1941	0.1911	0.2159	0.1981	0.1945	0.1821	0.1885	0.2238	0.2301	0.2138	0.206	0.2457	0.2404	0.2102	0.0187968	8.94233
6	7	8	9	10
0.7665	0.8104	0.78	0.7641	0.9111
0.7115	0.7484	0.725	0.7071	0.8391
0.6565	0.6864	0.67	0.6501	0.7671
0.6015	0.6244	0.615	0.5931	0.6951
0.5465	0.5624	0.56	0.5361	0.6231
0.4915	0.5004	0.505	0.4791	0.5511
0.4365	0.4384	0.45	0.4221	0.4791
0.3815	0.3764	0.395	0.3651	0.4071
0.3265	0.3144	0.34	0.3081	0.3351
0.2715	0.2524	0.285	0.2511	0.2631
0.2165	0.1904	0.23	0.1941	0.1911
11	12	13	14	15
0.7359	0.6881	0.6245	0.7621	0.6485
0.6839	0.6391	0.5815	0.7041	0.6025
0.6319	0.5901	0.5385	0.6461	0.5565
0.5799	0.5411	0.4955	0.5881	0.5105
0.5279	0.4921	0.4525	0.5301	0.4645
0.4759	0.4431	0.4095	0.4721	0.4185
0.4239	0.3941	0.3665	0.4141	0.3725
0.3719	0.3451	0.3235	0.3561	0.3265
0.3199	0.2961	0.2805	0.2981	0.2805
0.2679	0.2471	0.2375	0.2401	0.2345
0.2159	0.1981	0.1945	0.1821	0.1885
16	17	18	19	20
0.7538	0.8101	0.7638	0.686	0.7557
0.7008	0.7521	0.7088	0.638	0.7047
0.6478	0.6941	0.6538	0.59	0.6537
0.5948	0.6361	0.5988	0.542	0.6027
0.5418	0.5781	0.5438	0.494	0.5517
0.4888	0.5201	0.4888	0.446	0.5007
0.4358	0.4621	0.4338	0.398	0.4497
0.3828	0.4041	0.3788	0.35	0.3987
0.3298	0.3461	0.3238	0.302	0.3477
0.2768	0.2881	0.2688	0.254	0.2967
0.2238	0.2301	0.2138	0.206	0.2457
21
0.9504
0.8794
0.8084
0.7374
0.6664
0.5954
0.5244
0.4534
0.3824
0.3114
0.2404

## Sheet: final results_BenchPress
1	2	3	4	5	subjects
0.7835	0.5695	0.8865	1.0143	0.4915
0.7225	0.5265	0.8145	0.9283	0.4605			0	0.7835	0.5695	0.8865	1.0143	0.4915	0.8603	0.8642	0.545	0.728	0.6192	0.935	0.8597	0.9431	0.7939	0.5265	0.695	0.7017	0.9735	0.9789	0.8335	0.9014	0.7636	0.7849	0.157397	20.0532
0.6615	0.4835	0.7425	0.8423	0.4295			10	0.7225	0.5265	0.8145	0.9283	0.4605	0.7913	0.7952	0.507	0.672	0.5762	0.861	0.7897	0.8671	0.7319	0.4895	0.642	0.6517	0.8975	0.9009	0.7675	0.8284	0.7056	0.723945	0.14221	19.6438
0.6005	0.4405	0.6705	0.7563	0.3985			20	0.6615	0.4835	0.7425	0.8423	0.4295	0.7223	0.7262	0.469	0.616	0.5332	0.787	0.7197	0.7911	0.6699	0.4525	0.589	0.6017	0.8215	0.8229	0.7015	0.7554	0.6476	0.662991	0.127046	19.1626
0.5395	0.3975	0.5985	0.6703	0.3675			30	0.6005	0.4405	0.6705	0.7563	0.3985	0.6533	0.6572	0.431	0.56	0.4902	0.713	0.6497	0.7151	0.6079	0.4155	0.536	0.5517	0.7455	0.7449	0.6355	0.6824	0.5896	0.602036	0.111915	18.5894
0.4785	0.3545	0.5265	0.5843	0.3365			40	0.5395	0.3975	0.5985	0.6703	0.3675	0.5843	0.5882	0.393	0.504	0.4472	0.639	0.5797	0.6391	0.5459	0.3785	0.483	0.5017	0.6695	0.6669	0.5695	0.6094	0.5316	0.541082	0.0968312	17.8958
0.4175	0.3115	0.4545	0.4983	0.3055			50	0.4785	0.3545	0.5265	0.5843	0.3365	0.5153	0.5192	0.355	0.448	0.4042	0.565	0.5097	0.5631	0.4839	0.3415	0.43	0.4517	0.5935	0.5889	0.5035	0.5364	0.4736	0.480127	0.0818213	17.0416
0.3565	0.2685	0.3825	0.4123	0.2745			60	0.4175	0.3115	0.4545	0.4983	0.3055	0.4463	0.4502	0.317	0.392	0.3612	0.491	0.4397	0.4871	0.4219	0.3045	0.377	0.4017	0.5175	0.5109	0.4375	0.4634	0.4156	0.419173	0.0669351	15.9684
0.2955	0.2255	0.3105	0.3263	0.2435			70	0.3565	0.2685	0.3825	0.4123	0.2745	0.3773	0.3812	0.279	0.336	0.3182	0.417	0.3697	0.4111	0.3599	0.2675	0.324	0.3517	0.4415	0.4329	0.3715	0.3904	0.3576	0.358218	0.0522784	14.594
0.2345	0.1825	0.2385	0.2403	0.2125			80	0.2955	0.2255	0.3105	0.3263	0.2435	0.3083	0.3122	0.241	0.28	0.2752	0.343	0.2997	0.3351	0.2979	0.2305	0.271	0.3017	0.3655	0.3549	0.3055	0.3174	0.2996	0.297264	0.0381169	12.8226
0.1735	0.1395	0.1665	0.1543	0.1815			90	0.2345	0.1825	0.2385	0.2403	0.2125	0.2393	0.2432	0.203	0.224	0.2322	0.269	0.2297	0.2591	0.2359	0.1935	0.218	0.2517	0.2895	0.2769	0.2395	0.2444	0.2416	0.236309	0.0252962	10.7047
							100	0.1735	0.1395	0.1665	0.1543	0.1815	0.1703	0.1742	0.165	0.168	0.1892	0.195	0.1597	0.1831	0.1739	0.1565	0.165	0.2017	0.2135	0.1989	0.1735	0.1714	0.1836	0.175355	0.0171475	9.77876
6	7	8	9	10
0.8603	0.8642	0.545	0.728	0.6192
0.7913	0.7952	0.507	0.672	0.5762
0.7223	0.7262	0.469	0.616	0.5332
0.6533	0.6572	0.431	0.56	0.4902
0.5843	0.5882	0.393	0.504	0.4472
0.5153	0.5192	0.355	0.448	0.4042
0.4463	0.4502	0.317	0.392	0.3612
0.3773	0.3812	0.279	0.336	0.3182
0.3083	0.3122	0.241	0.28	0.2752
0.2393	0.2432	0.203	0.224	0.2322
0.1703	0.1742	0.165	0.168	0.1892
11	12	13	14	15
0.935	0.8597	0.9431	0.7939	0.5265
0.861	0.7897	0.8671	0.7319	0.4895
0.787	0.7197	0.7911	0.6699	0.4525
0.713	0.6497	0.7151	0.6079	0.4155
0.639	0.5797	0.6391	0.5459	0.3785
0.565	0.5097	0.5631	0.4839	0.3415
0.491	0.4397	0.4871	0.4219	0.3045
0.417	0.3697	0.4111	0.3599	0.2675
0.343	0.2997	0.3351	0.2979	0.2305
0.269	0.2297	0.2591	0.2359	0.1935
0.195	0.1597	0.1831	0.1739	0.1565
16	17	18	19	20
0.695	0.7017	0.9735	0.9789	0.8335
0.642	0.6517	0.8975	0.9009	0.7675
0.589	0.6017	0.8215	0.8229	0.7015
0.536	0.5517	0.7455	0.7449	0.6355
0.483	0.5017	0.6695	0.6669	0.5695
0.43	0.4517	0.5935	0.5889	0.5035
0.377	0.4017	0.5175	0.5109	0.4375
0.324	0.3517	0.4415	0.4329	0.3715
0.271	0.3017	0.3655	0.3549	0.3055
0.218	0.2517	0.2895	0.2769	0.2395
0.165	0.2017	0.2135	0.1989	0.1735
21	22
0.9014	0.7636
0.8284	0.7056
0.7554	0.6476
0.6824	0.5896
0.6094	0.5316
0.5364	0.4736
0.4634	0.4156
0.3904	0.3576
0.3174	0.2996
0.2444	0.2416
0.1714	0.1836

## Sheet: BenchPress vs LegPress
	20_LP	0.7274	0.7227	0.6497	0.5987	0.7227	0.6565	0.6864	0.67	0.6501	0.7671	0.6319	0.5901	0.5385	0.6461	0.5565	0.6478	0.6941	0.6538	0.59	0.6537	0.8084	0.660105	0.0664463	0.920084	-0.0368196	10.066	8.62358	15.5335
	20	0.6615	0.4835	0.7425	0.8423	0.4295	0.7223	0.7262	0.469	0.616	0.5332	0.787	0.7197	0.7911	0.6699	0.4525	0.589	0.6017	0.8215	0.8229	0.7015	0.7554	0.663724	0.130136			19.607	0.992297	3.5098
	30_LP	0.6624	0.6567	0.5967	0.5527	0.6567	0.6015	0.6244	0.615	0.5931	0.6951	0.5799	0.5411	0.4955	0.5881	0.5105	0.5948	0.6361	0.5988	0.542	0.6027	0.7374	0.603867	0.0586085	0.968758	0.0142924	9.70553
	30	0.6005	0.4405	0.6705	0.7563	0.3985	0.6533	0.6572	0.431	0.56	0.4902	0.713	0.6497	0.7151	0.6079	0.4155	0.536	0.5517	0.7455	0.7449	0.6355	0.6824	0.602629	0.114643			19.0239
	40_LP	0.5974	0.5907	0.5437	0.5067	0.5907	0.5465	0.5624	0.56	0.5361	0.6231	0.5279	0.4921	0.4525	0.5301	0.4645	0.5418	0.5781	0.5438	0.494	0.5517	0.6664	0.547629	0.0508898	0.82263	0.0812219	9.29277
	40	0.5395	0.3975	0.5985	0.6703	0.3675	0.5843	0.5882	0.393	0.504	0.4472	0.639	0.5797	0.6391	0.5459	0.3785	0.483	0.5017	0.6695	0.6669	0.5695	0.6094	0.541533	0.0991987			18.3181
	50_LP	0.5324	0.5247	0.4907	0.4607	0.5247	0.4915	0.5004	0.505	0.4791	0.5511	0.4759	0.4431	0.4095	0.4721	0.4185	0.4888	0.5201	0.4888	0.446	0.5007	0.5954	0.49139	0.0433541	0.631485	0.172231	8.82275
	50	0.4785	0.3545	0.5265	0.5843	0.3365	0.5153	0.5192	0.355	0.448	0.4042	0.565	0.5097	0.5631	0.4839	0.3415	0.43	0.4517	0.5935	0.5889	0.5035	0.5364	0.480438	0.0838286			17.4484
	60_LP	0.4674	0.4587	0.4377	0.4147	0.4587	0.4365	0.4384	0.45	0.4221	0.4791	0.4239	0.3941	0.3665	0.4141	0.3725	0.4358	0.4621	0.4338	0.398	0.4497	0.5244	0.435152	0.036116	0.395005	0.301999	8.29963
	60	0.4175	0.3115	0.4545	0.4983	0.3055	0.4463	0.4502	0.317	0.392	0.3612	0.491	0.4397	0.4871	0.4219	0.3045	0.377	0.4017	0.5175	0.5109	0.4375	0.4634	0.419343	0.0685832			16.3549
	70_LP	0.4024	0.3927	0.3847	0.3687	0.3927	0.3815	0.3764	0.395	0.3651	0.4071	0.3719	0.3451	0.3235	0.3561	0.3265	0.3828	0.4041	0.3788	0.35	0.3987	0.4534	0.378914	0.0293961	0.155205	0.4982	7.75799
	70	0.3565	0.2685	0.3825	0.4123	0.2745	0.3773	0.3812	0.279	0.336	0.3182	0.417	0.3697	0.4111	0.3599	0.2675	0.324	0.3517	0.4415	0.4329	0.3715	0.3904	0.358248	0.0535693			14.9531
	80_LP	0.3374	0.3267	0.3317	0.3227	0.3267	0.3265	0.3144	0.34	0.3081	0.3351	0.3199	0.2961	0.2805	0.2981	0.2805	0.3298	0.3461	0.3238	0.302	0.3477	0.3824	0.322676	0.0236407	0.019247	0.814219	7.32644
	80	0.2955	0.2255	0.3105	0.3263	0.2435	0.3083	0.3122	0.241	0.28	0.2752	0.343	0.2997	0.3351	0.2979	0.2305	0.271	0.3017	0.3655	0.3549	0.3055	0.3174	0.297152	0.0390545			13.1429
	90_LP	0.2724	0.2607	0.2787	0.2767	0.2607	0.2715	0.2524	0.285	0.2511	0.2631	0.2679	0.2471	0.2375	0.2401	0.2345	0.2768	0.2881	0.2688	0.254	0.2967	0.3114	0.266438	0.0197132	0.000206399	1.33233	7.39878
	90	0.2345	0.1825	0.2385	0.2403	0.2125	0.2393	0.2432	0.203	0.224	0.2322	0.269	0.2297	0.2591	0.2359	0.1935	0.218	0.2517	0.2895	0.2769	0.2395	0.2444	0.236057	0.0258926			10.9688
	100_LP	0.2074	0.1947	0.2257	0.2307	0.1947	0.2165	0.1904	0.23	0.1941	0.1911	0.2159	0.1981	0.1945	0.1821	0.1885	0.2238	0.2301	0.2138	0.206	0.2457	0.2404	0.2102	0.0187968	2.48281e-06	1.94331	8.94233
	100	0.1735	0.1395	0.1665	0.1543	0.1815	0.1703	0.1742	0.165	0.168	0.1892	0.195	0.1597	0.1831	0.1739	0.1565	0.165	0.2017	0.2135	0.1989	0.1735	0.1714	0.174962	0.0174693			9.98465
		0.2102	0.0187968
		0.174962	0.0174693
